# Supplementary material
Source: ML conference proceedings conference paper supplement (https://openreview.net/forum?id=hreVjQIgyt)
Supplement: supplementary_material [file A4S_Reproducibility Statement.pdf › supplementary_material_fin/A4S_Reproducibility Statement.pdf]

# Reproducibility Statement for “Thermodynamic Guardrails: A Bond Graph-Based Method for Self-Correcting Model Reduction in Autonomous Scientific Discovery”

Gemini 2.5 Pro, Liner AI, Jaeyoung Choi

October 19, 2025

## 1 Overview

This document provides all necessary information to reproduce the simulations, figures, and key findings presented in the main paper. The experiments involve the simulation of a Michaelis-Menten enzymatic reaction using three different models: the full Stochastic Simulation Algorithm (SSA) as the ground truth, the stochastic total quasi-steady-state approximation (stQSSA), and our proposed hybrid model that uses a thermodynamic guardrail to switch between stQSSA and SSA. All code is provided in the supplementary materials, and a detailed step-by-step guide for running the simulations is available in the README.md file.

## 2 Hardware

All simulations were performed on a standard consumer-grade laptop. The computational cost is negligible (in minutes) in `run_ground_truth.py`, `run_hybrid.py`, `process_data.py`, and `run_sweep_heatmap.py`. However, it is acknowledged that `run_sweep_heatmap.py` may take several hours to complete in larger scale due to the extensive parameter sweeps involved. The specific hardware components used are listed below.

- **CPU:** Apple M4, 10-core.
- **RAM:** 16GB.
- **Operating System:** MacOS Sequoia 15.6.1.

## 3 Numerical Values

This section details the kinetic, concentration, and thermodynamic parameters required to replicate the results.

### 3.1 Kinetic and Concentration Parameters

The initial concentrations and kinetic rate constants for the Michaelis-Menten model ( $E + S \rightleftharpoons ES \rightleftharpoons P$ ) are explicitly defined in Section 3.4 of the main paper. For clarity, they are:

- $[E_T] = 10$  (Total Enzyme)
- $[S_0] = 10$  (Initial Substrate)
- $k_1 = 100$
- $k_{-1} = 1$
- $k_2 = 1$
- $k_{-2} = 0.01$

### 3.2 Thermodynamic Calculations and Constants

The thermodynamic guardrail relies on calculating the net thermodynamic affinity ( $A_{\text{net}}$ ) of the overall reaction  $S \rightleftharpoons P$ . The affinity serves as the driving force for the reaction.

The chemical potential,  $\mu_i$ , for a given species  $i$  is calculated as:

$$\mu_i = \mu_i^0 + RT \ln[i] \quad (1)$$

where  $\mu_i^0$  is the standard chemical potential,  $R$  is the ideal gas constant,  $T$  is the temperature, and  $[i]$  is the concentration of the species.

The net affinity is the difference between the chemical potential of the reactant ( $S$ ) and the product ( $P$ ):

$$A_{\text{net}} = \mu_S - \mu_P \quad (2)$$

By substituting Equation 1 into Equation 2, the expression becomes:

$$A_{\text{net}} = (\mu_S^0 - \mu_P^0) + RT \ln \left( \frac{[S]}{[P]} \right) \quad (3)$$

For the simulations presented in this work, the standard Gibbs free energies ( $g_S$  and  $g_E$ ) are assumed to be zero. This simplifies the calculation, since  $g_P = -\ln(10000)$ :

$$A_{\text{net}} = RT \ln \left( 10000 \cdot \frac{[S]}{[P]} \right) \quad (4)$$

The specific physical constants used in the simulation code (`run_hybrid.py`) are:

- **Ideal Gas Constant (R):** 8.314 J K<sup>-1</sup>mol<sup>-1</sup>
- **Temperature (T):** 310.15 K
